# Supplementary material for: Low-temperature, high-performance thin-film solid oxide fuel cells with tailored nano-column structures of a sputtered Ni anode
Source: Royal Society of Chemistry journal article supplement (doi:10.1039/d0ta06255c), 2020-01-01
Supplement: d0ta06255c1.pdf [file d0ta06255c1.pdf]

## Supporting Information

### Low-Temperature, High-Performance Thin-Film Solid Oxide Fuel Cells with Tailored Nano-Column Structures of a Sputtered Ni Anode

*Wonjong Yu, Yonghyun Lim, Sanghoon Lee, Arunkumar Pandiyan, Gu Young Cho\*, and Suk Won Cha\**

#### 1. STEM-EDX analysis of TF-SOFCs

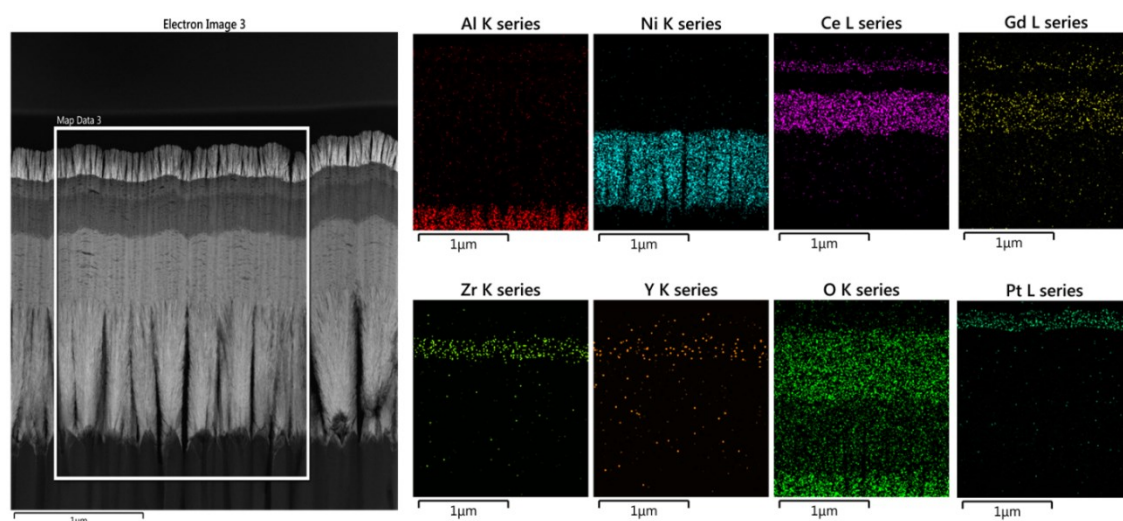

**Fig. S1.** STEM-EDX images of TF-SOFCs. The distribution of elements is analyzed by mapping the white line box region.

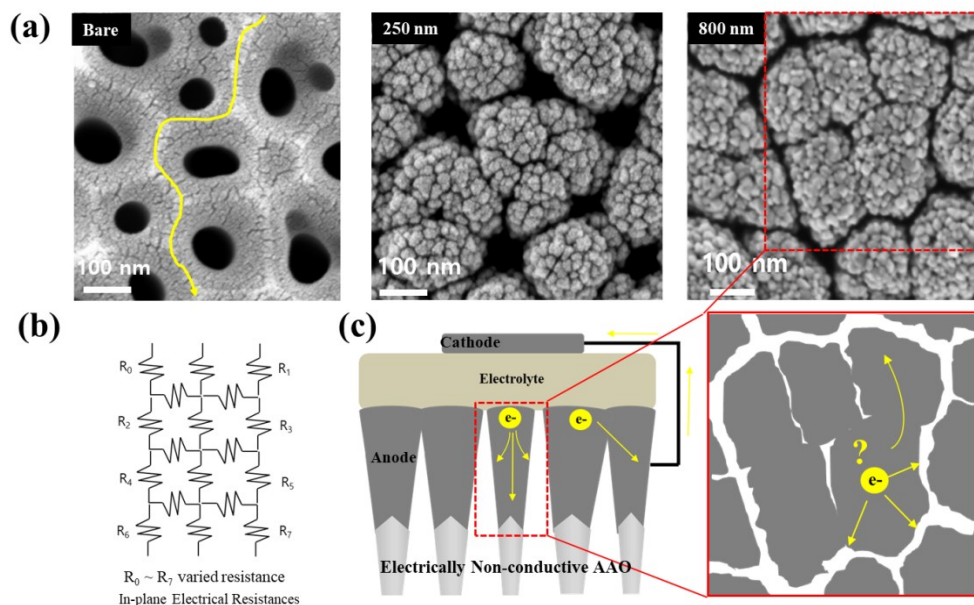

**Fig. S2.** (a) Surface FESEM views of bare AAO substrate, 250nm-thick, and 800nm-thick sputtered anodes. (b) Conceptual equivalent-circuit for current collecting in sputtered Ni anode deposited on nanoporous AAO substrate. (c) A schematic illustration of an electron pathway produced from the electrolyte/electrode interface in AAO supported TF-SOFCs architecture.

## 2. XRD analysis for the sputtered anodes.

**Table S1.** Texture coefficient (TC) calculated for the sputtered Ni anodes on amorphous quartz wafer.

| <i>Sample Detail</i> | <i>(111)</i> | <i>(200)</i> | <i>(220)</i> |
|----------------------|--------------|--------------|--------------|
| ROT1(45°)            | 1.38         | 0.78         | 0.82         |
| ROT3(45°)            | 1.45         | 0.97         | 0.55         |
| ROT2(45°)            | 1.46         | 0.76         | 0.76         |
| ROT1(75°)            | 1.48         | 0.88         | 0.63         |

### 3. Electrochemical performance of TF-SOFCs with nanostructured Ni anode.

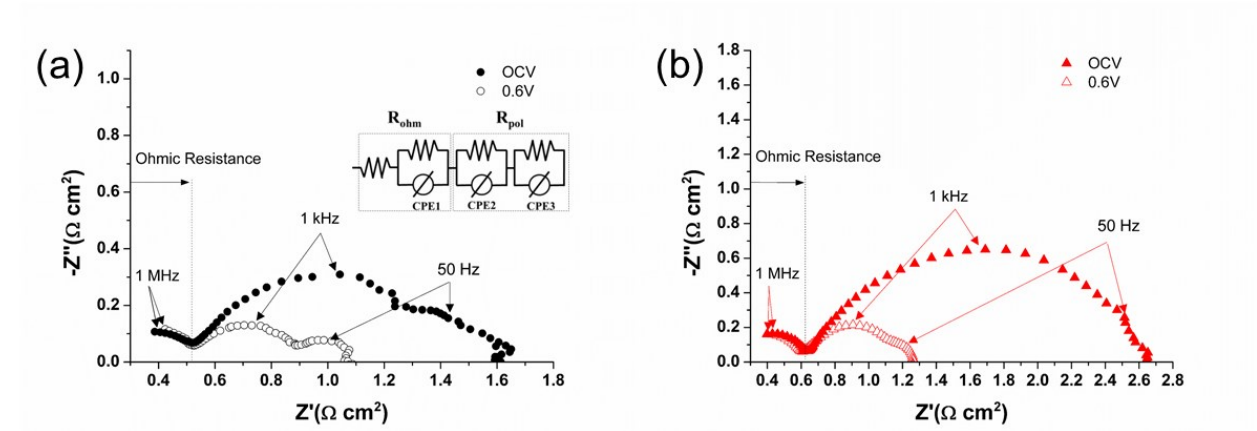

**Fig. S3.** Electrochemical impedance spectroscopy (EIS) analysis of (a) ROT1(75°) and (b) ROT1(45°) cells measured at 0.6 and OCV.

### 5. Performance comparison of low temperature solid oxide fuels (LT-SOFCs)

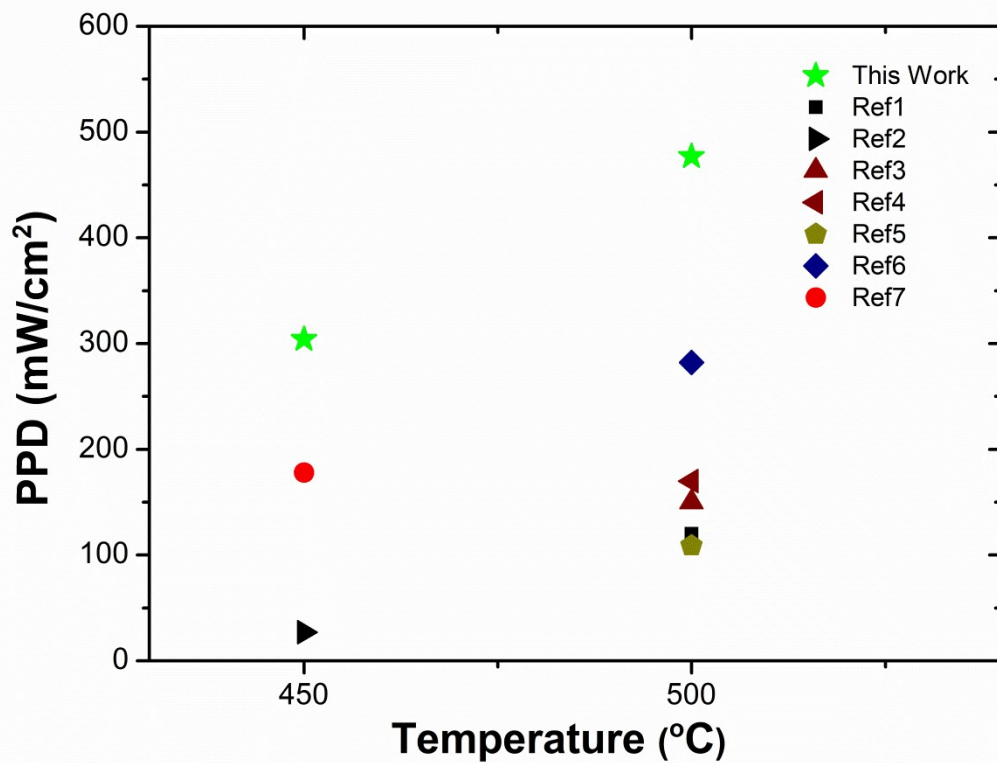

**Fig. S4.** Performance comparison with reported literature data related to AAO supported thin-film SOFCs. All of the references use Ni-based anode fabricated by sputtering. Hydrogen gas is used for the anode side, and the cathode is exposed to an ambient atmosphere. (PPD: peak power density)(Ref number refers to the supplementary references listed in the last section.)<sup>[1-7]</sup>

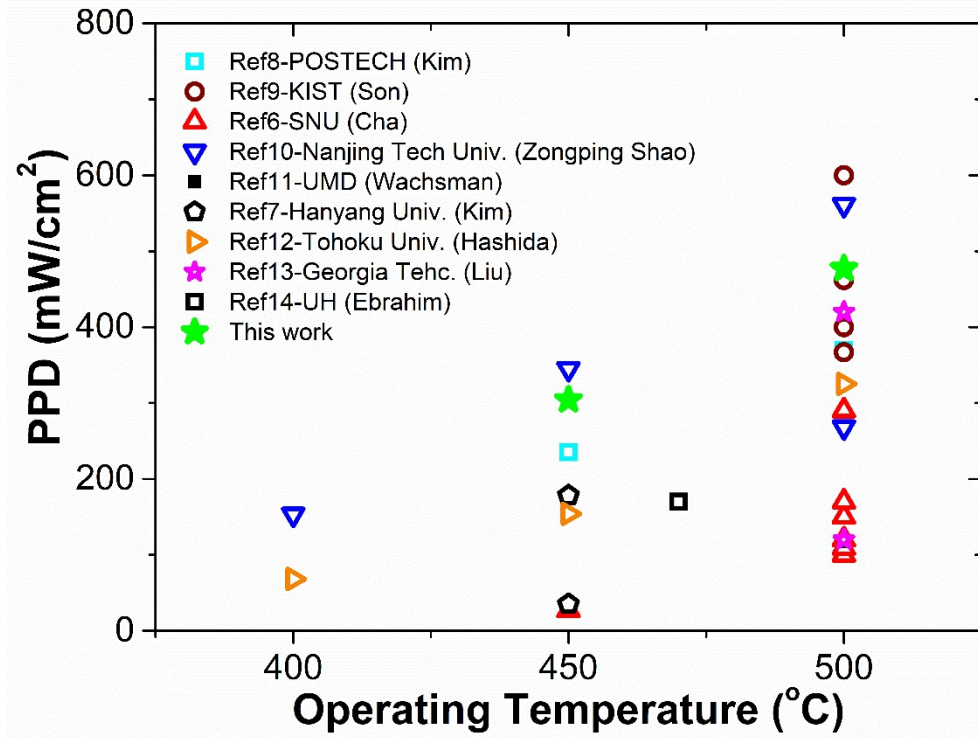

**Fig. S5.** Performance comparison with reported literature data related to other cell configurations.<sup>[8-14]</sup>

### 3. Surface FESEM analysis and image processing for TPBs length calculation.

In accordance with the model suggested by Bouvard *et al.*, the average coordination number of the electronic and ionic phases can be expressed as

$$Z_{el} = 3 + \frac{Z - 3}{n_{el} + (1 - n_{el})P^2} \quad (7)$$

$$Z_{io} = 3 + \frac{(Z - 3)P^2}{n_{el} + (1 - n_{el})P^2} \quad (8)$$

$$n_{el} = \frac{\varphi_{el}P^3}{1 - \varphi_{el} + \varphi_{el}P^3} \quad (9)$$

where  $P$  ( $\equiv r_{io}/r_{el}$ ) is the size ratio of ionic particles to electronic particles;  $n_{el}$  is the number fraction of the electronic phase;  $\varphi_{el}$  is the number fraction of the ionic phase; and  $Z$  is the average coordination number, typically assumed to be 6. The coordination number between electronic-phase (i) and ionic-phase (j) is given as

$$Z_{i-j} = n_j \frac{Z_i Z_j}{Z} \quad (10)$$

The probability that an i-phase particle in the percolated cluster connects the two ends of the composite;

$$P_i = \left\{ 1 - \left[ \frac{(4.236 - Z_{i-j})}{2.472} \right]^{2.5} \right\}^{0.4} \quad (11)$$

The threshold used in this formula, introduced by Suzuki *et al.*, means that  $Z_{i-j}$  value cannot be greater than 4.236.<sup>48</sup> The length of a neck formed between Ni and GDC particles is considered the TPB length, and neck radius is denoted as  $r_c$ .

$$r_c = \sin \theta_c \cdot \min(r_{el}, r_{io}) \quad (12)$$

where  $\theta_c$  is generally considered to be  $15^\circ$ . By combining all of these variables, the length of TPBs can be calculated as;

$$l_{tpb} = 2\pi r_c N_t n_{el} n_{io} P_{el} P_{io} \frac{Z_{el} Z_{io}}{Z} \quad (13)$$

$$N_t = \frac{1 - \varepsilon_{pore}}{\frac{4}{3}\pi r_{el}^3 [n_{el} + (1 - n_{el})P^3]} \quad (14)$$

where  $\varepsilon_{pore}$  is the volume fraction of the pore, which is measured from HR-TEM images.



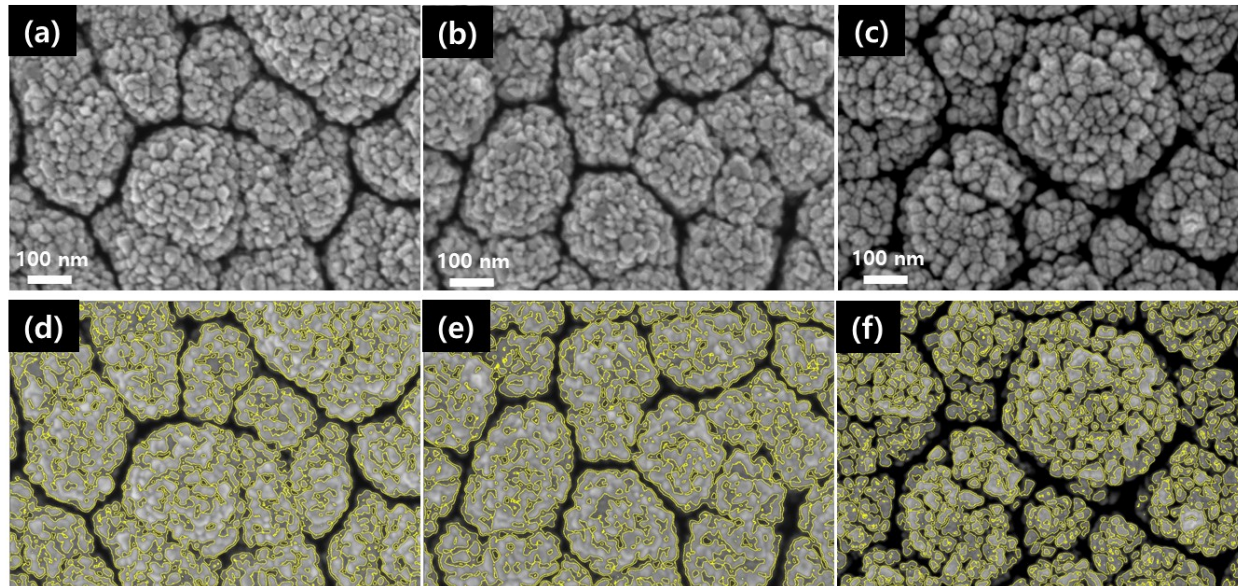

**Fig. S6.** Surface FESEM analysis for sputtered Ni anode varied with (a) ROT1(45°), (b) ROT2(45°), (c) ROT3(45°). Image processing for calculating TPBs length by applying volume expansion method of (d) ROT1(45°), (e) ROT2(45°), and (f) ROT3(45°). The yellow line shown in the images represents an overlapping region between Ni and pore phases that expanded to an infinitely small area.

**Table S2.** Comparison of TPBs density calculated by using binary-random sphere model and volume expansion method.

| TPB density $L_{tpb}$ [ $\mu\text{m}/\mu\text{m}^3$ ] |           |           |           |
|-------------------------------------------------------|-----------|-----------|-----------|
| Method                                                | ROT3(45°) | ROT2(45°) | ROT1(45°) |
| <del>Binary-Random Sphere Model</del>                 | 66.21     | 84.63     | 91.26     |
| <del>Volume Expansion Method</del>                    | 65.26     | 75.83     | 79.08     |



#### 4. Dusty gas model (DGM) applied for nanostructured anode and cathode

*Mass transport equations*

$$\frac{\varepsilon}{RT} \frac{\partial (y_i P)}{\partial t} = -\nabla \cdot N_i + r_i \text{ (mol/m}^{-3}\text{s}^{-1}\text{)}$$

$\varepsilon$ : the porosity,  $N_i$ : the rate of mass transport,

$r_i$ : the rate of reaction inside the porous medium.

Assumption: the diffusion process is at steady-state, and the electrochemical reactions take place at the boundary of the electrode-electrolyte interface rather than throughout the porous medium.

$$\nabla \cdot N_i = 0$$

The dusty-gas model (DGM)

$$\frac{N_i}{D_{i,k}^{eff}} + \sum_{j=1, j \neq i}^n \frac{X_j N_i - X_i N_j}{D_{ij}^{eff}} = -\frac{P}{RT} \frac{dX_i}{dz} - \frac{X_i}{RT} \left( 1 + \frac{KP_t}{\mu D_{i,k}^{eff}} \right) \nabla P_i$$

$X_i$ : molar fraction,  $P_i$ : partial pressure,  $N_i$ : molar flux of gas species  $i$ .

$P_t$ : total pressure,  $\mu$  and  $K$ : mixture viscosity and permeability.

$$D_{i,k}^{eff} \text{ and } D_{ij}^{eff}$$

: effective Knudsen diffusion coefficients and effective binary diffusivities

Assumption: Pressure is uniform

$$\frac{N_i}{D_{i,k}^{eff}} + \sum_{j=1, j \neq i}^n \frac{X_j N_i - X_i N_j}{D_{ij}^{eff}} = -\frac{P}{RT} \frac{dX_i}{dz}$$

For diffusion with heterogeneous chemical reaction, the flux ratios are governed by reaction stoichiometry—Graham's law of diffusion in gaseous mixtures.

$$\sum_{i=1}^n N_i \sqrt{M_i}$$

$M_i$ : the molecular weight of component  $i$ .

For binary component systems.

$$\frac{N_1}{D_{1,k}^{eff}} + \frac{X_2 N_1 - X_1 N_2}{D_{12}^{eff}} = -\frac{P dX_1}{RT dz}$$

$$N_1 \left( \frac{1}{D_{1,k}^{eff}} + \frac{X_2 - X_1 N_2/N_1}{D_{12}^{eff}} \right) = -\frac{P dX_1}{RT dz}$$

$$y_2 = 1 - y_1, N_2/N_1 = -\sqrt{M_1/M_2} \text{ (Gram's law)}$$

$$N_1 = -\frac{P}{RT} \left[ \frac{1}{D_{1,k}^{eff}} + \frac{1 - \alpha X_1}{D_{12}^{eff}} \right]^{-1} \frac{dX_1}{dz}$$

$$\alpha = 1 - \left( \frac{M_1}{M_2} \right)^{1/2}$$

$$\frac{d^2 X_1}{dz^2} + \frac{\alpha}{D_{12}^{eff}} \left[ \frac{1}{D_{1,k}^{eff}} + \frac{1 - \alpha X_1}{D_{12}^{eff}} \right]^{-1} \left( \frac{dX_1}{dz} \right)^2 = 0$$

Initial conditions:

$$X_{1,z=0} = X_{1,bulk}$$

$$\left( \frac{dX_1}{dz} \right)_{z=0} = -\frac{JRT}{2PF} \left[ \frac{1}{D_{1,k}^{eff}} + \frac{1 - \alpha X_1}{D_{12}^{eff}} \right]$$

$$D_{i,K}^{eff} = D_{i,K} \frac{\varepsilon_{pore}}{\tau_{pore}}, D_{ij}^{eff} = D_{i,K} \frac{\varepsilon_{pore}}{\tau_{pore}}$$

$\tau_{pore}$ : tortuosity of the pore

$$D_{i,K} = \frac{d_p^2}{2 \cdot 3} \sqrt{\frac{8RT}{\pi M_i}}$$

$d_p$ : the mean pore diameter

$$d_p \approx d_h = \frac{4}{(S/\varepsilon)_{pore}}$$

$d_h$ : the hydraulic diameter,  $S$ : surface area of the pore

$$\frac{1}{D_a^{eff}} = \frac{\tau_{pore}}{\varepsilon_{pore}} \left( \frac{1}{D_{H_2-H_2O}} + \frac{1}{D_{H_2,K}} \right), \frac{1}{D_c^{eff}} = \frac{\tau_{pore}}{\varepsilon_{pore}} \left( \frac{1}{D_{O_2-N_2}} + \frac{1}{D_{N_2,K}} \right)$$

For the binary diffusion coefficients, Fuller-Schettler-Giddings' equation is adopted.

$$D_{ij} = \frac{0.01013T^{1.75}((1/M_i \times 10^3) + (1/M_j \times 10^3))^{1/2}}{P[(\sum v_i \times 10^6)^{1/3} + (\sum v_j \times 10^6)^{1/3}]^2}$$

$\sum v_i$ : the diffusion volume of the molecules of species  $i$ .

The equations given above are solved by the Runge-Kutta method with Matlab.

**Table S3.** Geometrical Variables for 1D simulation.

| <i>Variables</i>       | <i>Notation</i> | <i>Value</i> | <i>Unit</i> |
|------------------------|-----------------|--------------|-------------|
| Anode grain size       | $d_a$           | 3.3x10-8     | [m]         |
| Cathode grain size     | $d_c$           | 2.3x10-8     | [m]         |
| Electrolyte grain size | $d_e$           | 2.2x10-8     | [m]         |
| Electrode probability  | $\varphi_{el}$  | 0.42         |             |
| Anode tortuosity       | $\tau_{pore,a}$ | 1.3          |             |
| Cathode tortuosity     | $\tau_{pore,c}$ | 1.3          |             |

## References for supporting information

- 1 S. Ji, Y. H. Lee, T. Park, G. Y. Cho, S. Noh, Y. Lee, M. Kim, S. Ha, J. An and S. W. Cha, in *Thin Solid Films*, Elsevier, 2015, vol. 591, pp. 250–254.
- 2 J. Bae, I. Chang, S. Kang, S. Hong, S. W. Cha and Y. B. Kim, *J. Nanosci. Nanotechnol.*, 2014, **14**, 9294–9299.
- 3 S. Lee, G. Y. Cho, T. Park, Y. H. Lee, W. Yu, Y. Lee, I. Chang and S. W. Cha, *Thin Solid Films*, 2018, **666**, 177–181.
- 4 S. Noh, G. Y. Cho, Y. H. Lee, W. Yu, J. An and S. W. Cha, *Sci. Adv. Mater.*, 2016, **8**, 11–16.
- 5 Y. Kim, S. Noh, G. Y. Cho, T. Park, Y. H. Lee, W. Yu, Y. Lee, W. H. Tanveer and S. W. Cha, *Int. J. Precis. Eng. Manuf.*, 2016, **17**, 1079–1083.
- 6 Y. Lee, J. Park, W. Yu, W. H. Tanveer, Y. H. Lee, G. Y. Cho, T. Park, C. Zheng, W. Lee and S. W. Cha, *Energy*, 2018, **161**, 1133–1138.
- 7 Y. Lim, H. Lee, S. Hong and Y.-B. Kim, *J. Power Sources*, 2019, **412**, 160–169.
- 8 K. J. Kim, B. H. Park, S. J. Kim, Y. Lee, H. Bae and G. M. Choi, *Sci. Rep.*, 2016, **6**, 1–8.
- 9 H. S. Noh, K. J. Yoon, B. K. Kim, H. J. Je, H. W. Lee, J. H. Lee and J. W. Son, *J. Power Sources*, 2014, **247**, 105–111.
- 10 W. Zhou, Z. Shao, R. Ran, W. Jin and N. Xu, *Chem. Commun.*, 2008, 5791–5793.
- 11 H.-B.-R. Lee and S. F. Bent, *Chem. Mater.*, 2012, **24**, 279–286.
- 12 C. Ding, H. Lin, K. Sato and T. Hashida, *J. Memb. Sci.*, 2010, **350**, 1–4.
- 13 Y. Chen, B. deGlee, Y. Tang, Z. Wang, B. Zhao, Y. Wei, L. Zhang, S. Yoo, K. Pei, J. H. Kim, Y. Ding, P. Hu, F. F. Tao and M. Liu, *Nat. Energy*, 2018, **3**, 1042–1050.
- 14 R. Ebrahim, M. Yeleuov and A. Ignatiev, *Adv. Mater. Technol.*, 2017, **2**, 1700098.
